# Supplementary material for: Hydrophobic evaporable fullerene indanone ketone with low sublimation temperature and amorphous morphology for inverted perovskite solar cells
Source: Royal Society of Chemistry journal article supplement (doi:10.1039/d4cc02996h), 2024-01-01
Supplement: d4cc02996h1.pdf [file d4cc02996h1.pdf]

## Supporting Information

# Hydrophobic Evaporable Fullerene Indanone Ketone with Low Sublimation Temperature and Amorphous Morphology for Inverted Perovskite Solar Cells

Yong-Chang Zhai,<sup>a</sup> Koki Yamanaka,<sup>a</sup> Chu-Yang Yu,<sup>a</sup> Jun-Zhuo Wang,<sup>a</sup> Xue-Lin  
Zheng,<sup>a</sup> Miftahul Huda,<sup>a</sup> Naoyuki Imai,<sup>b</sup> Takeshi Igarashi,<sup>b</sup> Shinobu Aoyagi,<sup>\*c</sup> and  
Yutaka Matsuo<sup>\*a,d</sup>

*Address: <sup>a</sup>Department of Chemical Systems Engineering, Graduate School of  
Engineering, Nagoya University Furo-cho, Chikusa-ku, Nagoya 464-8603, Japan*

*<sup>b</sup>Institute for Advanced Fusion, Resonac Corporation 5-1 Okawa-cho, Kawasaki-  
ku, Kawasaki-shi, Kanagawa 210-0858, Japan.*

*<sup>c</sup>Department of Information and Basic Science, Nagoya City University Nagoya,  
467-8501, Japan.*

*<sup>d</sup>Institute of Materials Innovation, Institutes for Future Society, Nagoya University,  
Furo-cho, Chikusa-ku, Nagoya 464-8603, Japan*

Email: Yutaka Matsuo - matsuo.yutaka@material.nagoya-u.ac.jp

## Table of Contents

|                                                               |     |
|---------------------------------------------------------------|-----|
| 1. General                                                    | S3  |
| 2. Synthesis of CF <sub>3</sub> -FIDO                         | S5  |
| 3. FT-IR of CF <sub>3</sub> -FIDO                             | S8  |
| 3. Single crystal structure                                   | S9  |
| 4. <sup>1</sup> H NMR spectrum of evaporated                  | S10 |
| 5. TEM image of evaporated CF <sub>3</sub> -FIDO film         | S10 |
| 6. Cyclic voltammograms of fullerenes                         | S11 |
| 7. UV-visible spectroscopy                                    | S12 |
| 8. SEM picture of perovskite layer                            | S12 |
| 9. PSCs performance                                           | S13 |
| 10. Long-term stability of CF <sub>3</sub> -FIDO based device | S14 |
| 11. Water contact angle                                       | S14 |
| 12. NMR and MAIDI-TOF spectrum                                | S15 |

## 1. General

### Methods

To ensure optimal reaction conditions, all reactions that were sensitive to air or moisture were conducted in a dehydrated reaction vessel, under a carefully controlled nitrogen atmosphere. Analytical thin-layer chromatography (TLC) was performed using a glass plate coated with 0.25mm 230-400 mesh silica gel containing a fluorescent indicator, allowing for precise detection and analysis of the reaction components. To remove the organic solutions, a diaphragm pump through a rotary evaporator was employed for evacuation. Nuclear Magnetic Resonance (NMR) was taken by ECS 400 and ECA 600 (JEOL Co., Ltd.) at room temperature reported in parts per million (ppm).  $^1\text{H}$  NMR spectra were internally referenced to tetramethylsilane (0.00 ppm) or  $\text{CDCl}_3$  (7.260 ppm).  $^{13}\text{C}$  NMR spectra were internally referenced to tetramethylsilane (0.0 ppm) or  $\text{CDCl}_3$  (77.16 ppm). The data were presented as following order: chemical shift, multiplicity (s = singlet, d = doublet, t = triplet, hept = heptet, m = multiplet and/or multiplet resonances), coupling constant in hertz (Hz), and signal area integration in natural numbers, assignment (*italic*). Matrix assisted laser desorption/ionization time-of-flight mass spectrometry (MALDI-TOF MS) was taken by AXIMA Performance (SHIMADZU Co., Ltd.). Super Photon ring-8 GeV (Spring-8) was employed to analyse the structure of single crystal CF3-FIDO.

### Materials

Unless otherwise noted, all materials including dry solvents were obtained from commercial suppliers (Sigma-Aldrich, TCI, Wako) and used without further purification.

### **Photovoltaic Device fabrication and evaluation**

#### **Perovskite solar cells fabrication**

The perovskite solar cells structure was fabricated using ITO/PEDOT: PSS/Perovskite/Fullerene/BCP/Ag. ITO-coated glass (sheet resistance  $\leq 10 \Omega \text{ cm}^2$ )

was cleaned consecutively in deionized water, acetone, isopropanol, and ethanol ultrasonic baths for 15 min, respectively. The ITO glass was treated with UV-Ozone for 15 min before use. The PEDOT: PSS was spin-coated on the ITO glass at 3000 r for 30 s and annealed at 110 °C for 10 min. After annealing the PEDOT: PSS substrates was transferred to glovebox. The perovskite precursor solution with a formula  $\text{MAPbI}_3$  was prepared by mixing the 122 mg MAI and 355 mg  $\text{PbI}_2$  in 0.55 ml solvent with a DMF: DMSO volume ratio of 5: 1. To prepare the perovskite film 45  $\mu\text{L}$  of the perovskite precursor solution was spin-coated on the substrate at 4000 rpm for 20 s. 150  $\mu\text{L}$  of CB was dropped onto the film after at 5 s. Then the substrate was annealed at 110 °C for 10 min. 15 nm CF3-FIDO or C60, 3 nm BCP and 100 nm Ag were deposited by thermal evaporation under high vacuum ( $10^{-4}$  mbar).

### **Evaluation of photovoltaic performance**

The  $J-V$  measurement was performed via the solar simulator (HAL-C100, Asahi spectral) along with AM 1.5G spectra at 100  $\text{mW cm}^2$ . The source unit (B2902A, Keysight) was used to measure the  $J-V$  curve.

## 2. Synthesis of CF<sub>3</sub>-FIDO

### 2.1 Fullerene cation intermediate route

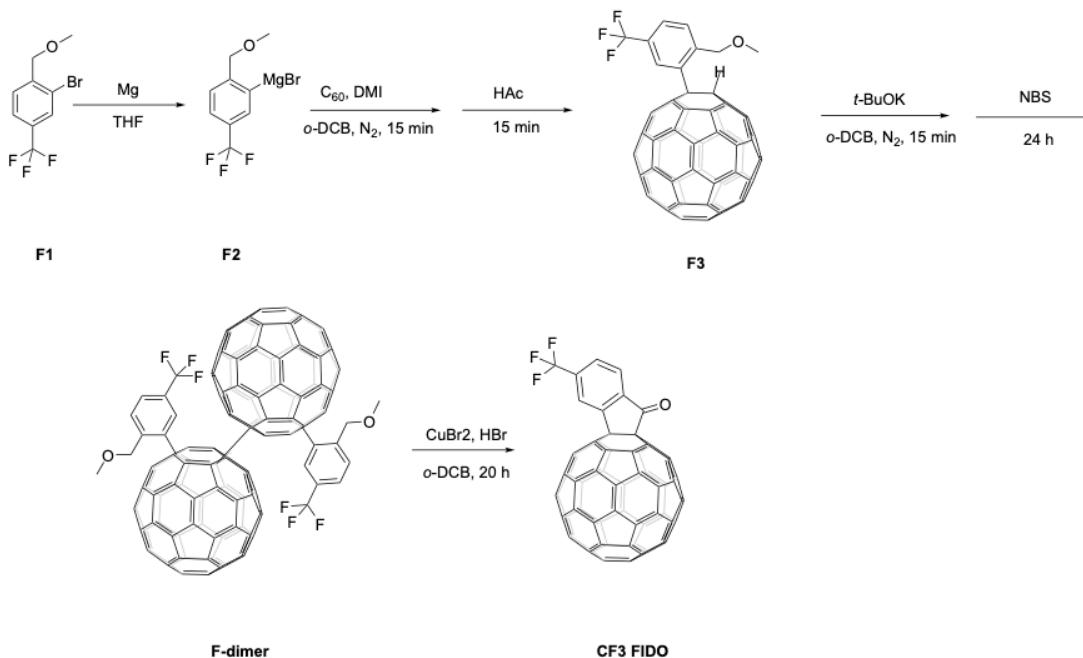

**Synthesis of Grignard reagent (F2).** An anhydrous tetrahydrofuran (THF) (10.0 mL) solution of **F1** (6 mmol) was slowly dropped into polished Mg powder (220.0 mg, 9 mmol) in a trace amount of I<sub>2</sub> as initiator under N<sub>2</sub> atmosphere at 0 °C. After being vigorously stirred for 1 h, the prepared Grignard solution (**F2**) was transferred by Schlenk operation and stocked in a Schlenk bottle. The concentration was confirmed before using through anhydrous titration by using menthol as titrant with a trace amount of 1,10-phenanthroline as indicator under N<sub>2</sub> atmosphere.

**Synthesis of (2-CH<sub>2</sub>OCH<sub>3</sub>-5-CF<sub>3</sub>)C<sub>60</sub>H (F3).** C<sub>60</sub> (1080 mg, 1.5 mmol) was dissolved in ortho-dichlorobenzene (o-DCB) (50.0 mL) containing 1,3-dimethyl-2-imidazolidinone (DMI) (5.0 mL, 45 mmol) with three times degass-N<sub>2</sub> refill at r.t., then the stocked Grignard reagent **F2** (7.5 mL, 4.5 mmol) was added under a N<sub>2</sub> atmosphere. After stirring for 15 min at r.t., the dark green reaction mixture was quenched by CH<sub>3</sub>COOH (300 μL). The dark green reaction mixture immediately

turned into brown, and the reaction mixture was condensed through evaporating the solvent under vacuum. Next, a silica gel chromatography with CS<sub>2</sub> as eluent was utilized to afford brownish powder **F3** Yield: **F3**, 955 mg, 70%. <sup>1</sup>H NMR (400 MHz, CHLOROFORM-D) δ 8.68 (s, 1H), 8.10 (d, *J* = 8.0 Hz, 1H), 7.88 (d, *J* = 8.1 Hz, 1H), 6.82 (s, 1H), 5.73 (s, 2H), 3.74 (s, 3H). <sup>13</sup>C NMR (99 MHz, CHLOROFORM-D) δ 152.87, 147.72, 147.40, 146.72, 146.55, 146.52, 146.36, 146.21, 145.80, 145.59, 145.57, 144.89, 144.59, 143.51, 142.83, 142.78, 142.22, 141.85, 141.59, 141.38, 140.59, 132.23, 131.23, 130.90, 126.78, 126.74, 126.70, 126.66, 125.60, 125.56, 125.52, 125.48, 122.62, 72.42, 68.05, 62.70. MALDI-TOF MS *m/z* calcd for C<sub>69</sub>H<sub>9</sub>F<sub>3</sub>O 910.06, found 909.99.

**Synthesis of fullerene F-dimer.** To a solution of **F3** (560.0 mg, 0.62 mmol) in 50.0 mL anhydrous *o*-DCB solution was added a solution of *t*-BuOK (0.74 mL, 0.74 mmol, 1M) in THF at r.t. under a N<sub>2</sub> atmosphere. After stirring for 15 mins, *N*-bromosuccinimide (NBS) (441.0 mg, 2.48 mmol) was added. The reaction mixture was vigorously stirred for 24 hours at r.t. under a N<sub>2</sub> atmosphere. Then the resulting brownish suspension was quenched by 1 mL H<sub>2</sub>O and an excess amount of MeOH was added to precipitate the crude product. Finally, titled **F-dimer** was collected as residue by filtration without necessities of further purifications.

**Synthesis of CF3-FIDO.** F-Dimer (700.0 mg, 0.38 mmol) was dissolved in *o*-DCB (50.0 mL), and CuBr<sub>2</sub> (678.9 mg, 3.04 mmol) was added as oxidant. After vigorously stirring at 135 °C for 1 hours, 1 mL Hydrogen bromide solution (47% HBr in water) was added. Then keeping vigorously stirring at 135 °C for 10 hours. Finally, the reaction mixture was condensed through evaporating the solvent under vacuum and followed by a silica gel column chromatography (CS<sub>2</sub>) to afford brownish powder **CF3-FIDO**. 330.0 mg, 48.6%. <sup>1</sup>H NMR (400 MHz, CHLOROFORM-D) δ 8.92 (s, 1H), 8.81 (d, *J* = 8.9 Hz, 1H), 8.01 (d, *J* = 10.4 Hz, 1H). <sup>13</sup>C NMR (101 MHz, CHLOROFORM-D) δ 197.88, 156.96, 153.32, 152.56,

147.65, 147.52, 147.41, 146.62, 146.37, 146.33, 145.94, 145.75, 145.68, 145.66, 145.61, 144.80, 144.45, 143.35, 143.01, 142.95, 142.62, 142.32, 142.30, 142.19, 142.17, 141.81, 140.91, 140.88, 138.83, 138.50, 137.40, 135.88, 135.62, 128.12, 127.37, 127.33, 124.23, 124.19, 83.67, 70.77. MALDI-TOF MS  $m/z$  calcd for  $C_{68}H_3F_3O$  892.01, found 891.88.

## 2.2 Retro Baeyer–Villiger reaction

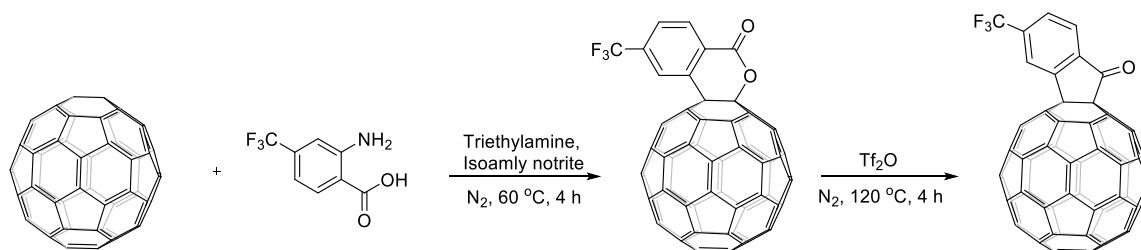

**Synthesis the CF<sub>3</sub>-C<sub>60</sub>-fused lactone.** C<sub>60</sub> (360.3 mg, 0.5 mmol) was dissolved into ortho-dichlorobenzene (*o*-DCB) (30.0 mL) in a 100 ml 2-neck flask with three times degass-N<sub>2</sub> refill at room temperature. Then the 2-Amino-4-(trifluoromethyl) benzoic Acid (513.0 mg, 2.5 mmol), triethylamine (416  $\mu$ L, 3.0 mmol), isoamyl nitrite (399  $\mu$ L, 3.0 mmol) was added into solution and keep stirring at 60 °C for 4 h. After the cooling down to the r.t. The reaction mixture was condensed through evaporating the solvent under vacuum. A short silica gel chromatography with *o*-DCB as eluent was utilized to afford crude brownish powder CF<sub>3</sub>-C<sub>60</sub>-fused lactone. Yield 140 mg, 30.8%. <sup>1</sup>H NMR (400 MHz, CHLOROFORM-D)  $\delta$  8.76 (dt,  $J$  = 1.5, 0.7 Hz, 1H), 8.59 (dp,  $J$  = 8.1, 0.8 Hz, 1H), 8.16 – 8.09 (m, 1H). <sup>13</sup>C NMR (101 MHz, CHLOROFORM-D)  $\delta$  160.19, 153.03, 148.99, 148.45, 147.97, 147.05, 147.01, 146.71, 146.68, 146.67, 145.93, 145.70, 145.13, 144.97, 144.77, 144.47, 143.35, 143.15, 143.12, 142.88, 142.55, 142.30, 141.56, 141.46, 140.40, 140.37, 138.64, 137.03, 136.70, 135.74, 135.09, 133.11, 126.70, 125.62. MALDI-TOF MS  $m/z$  calcd for  $C_{68}H_3F_3O_2$  908.01, found 908.10.

**Synthesis the CF3-FIDO.** CF3-C<sub>60</sub>-fused lactone (45.4 mg, 0.05 mmol) and Tf<sub>2</sub>O (25  $\mu$ L, 0.15 mmol) was dissolved into anhydrous *o*-DCB (5.0 ml) in a 15 ml glass tube with three times degass-N<sub>2</sub> refill at room temperature. After stirring for 4 h at 120  $^{\circ}$ C, the reaction mixture was flited through a short silica-gel column to remove some insoluble materials. Then methanol was utilized to settle the crude production. The CF3-FIDO then was purified by preparative HPLC to afford using toluene as eluant. Yield 15 mg, 34.0%.

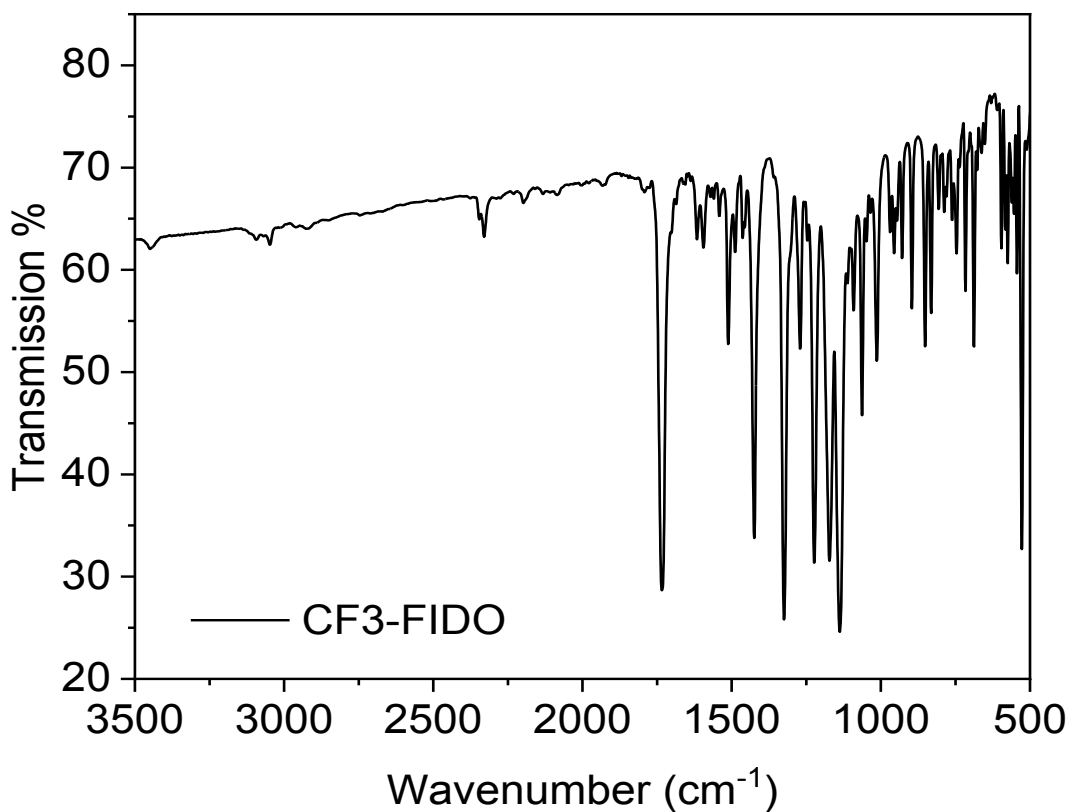

**Figure S1.** FT-IR of CF3-FIDO.



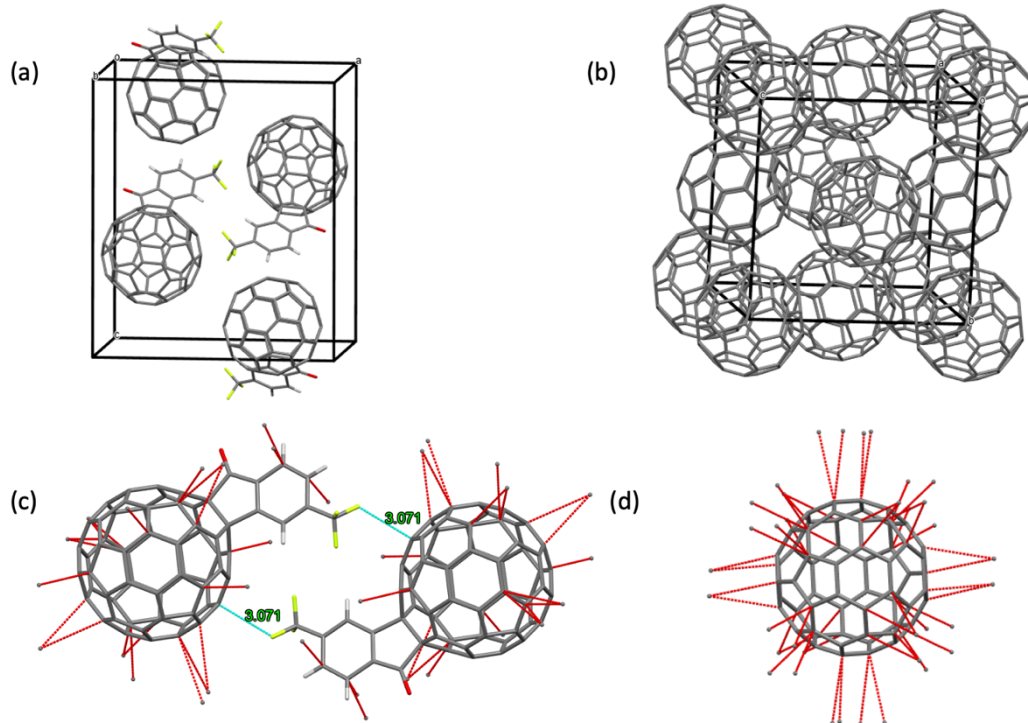

**Figure S2.** Single crystal structure of CF3-FIDO and C<sub>60</sub>. (a-b) The unit cell of CF3-FIDO and C<sub>60</sub>. (c-d) The short-contact of CF3-FIDO and C<sub>60</sub>. Mercury software was used to compare the CF3-FIDO and C<sub>60</sub> previously reported. [1]

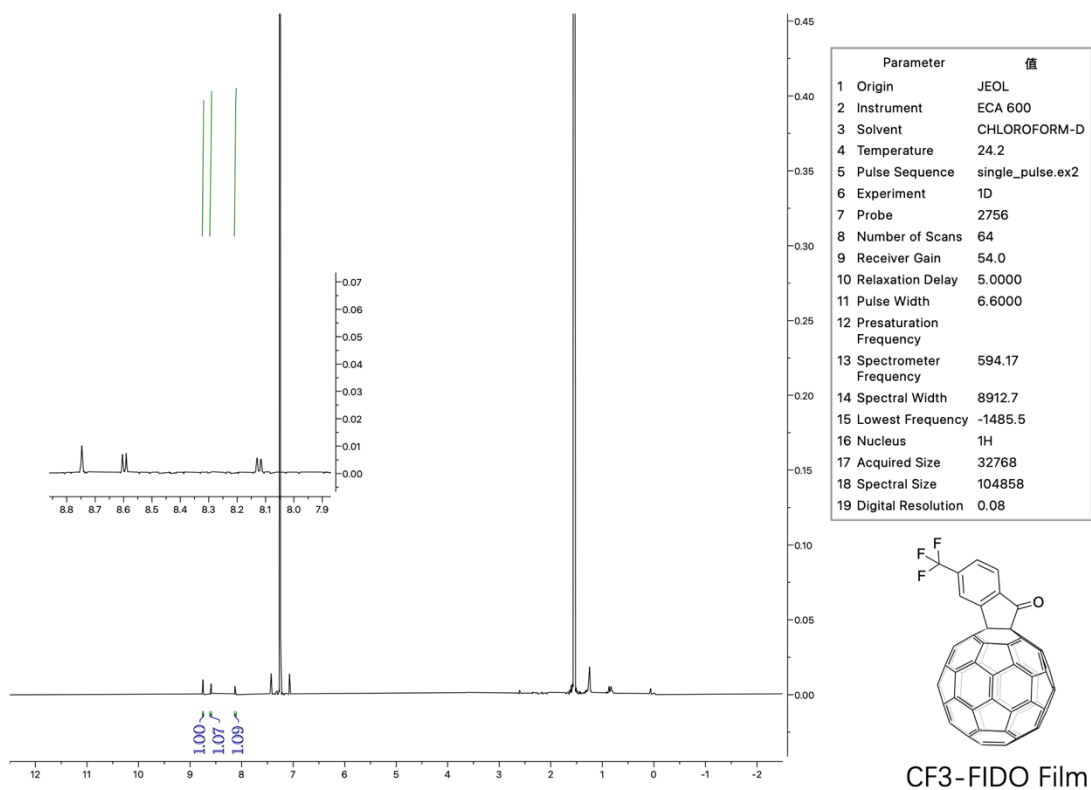

**Figure S3.** The  $^1\text{H}$  NMR of evaporated CF3-FIDO film. (The symmetrical peaks at 7.43 ppm and 7.08 ppm are satellite peaks of chloroform.)

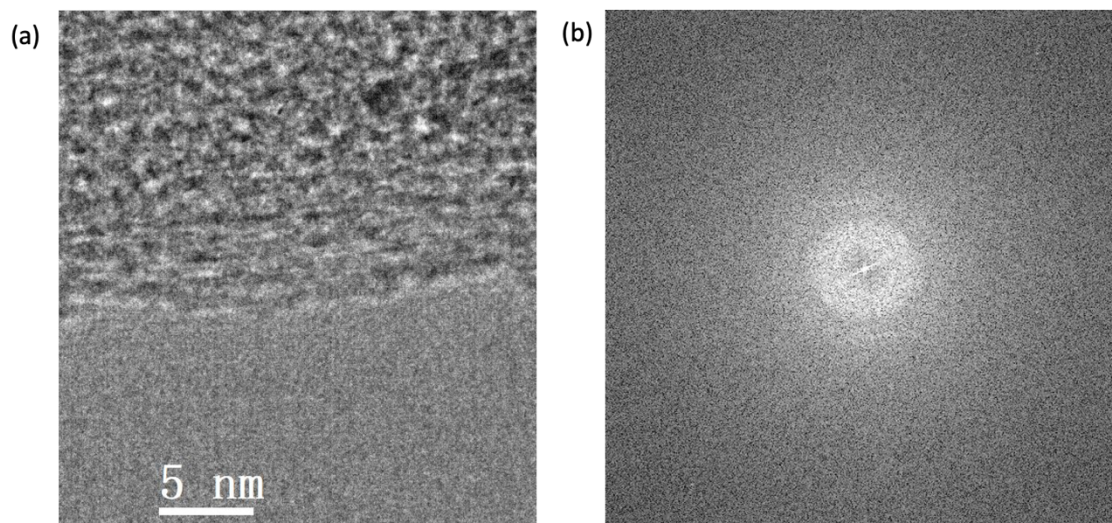

**Figure S4.** TEM image of evaporated CF3-FIDO film.

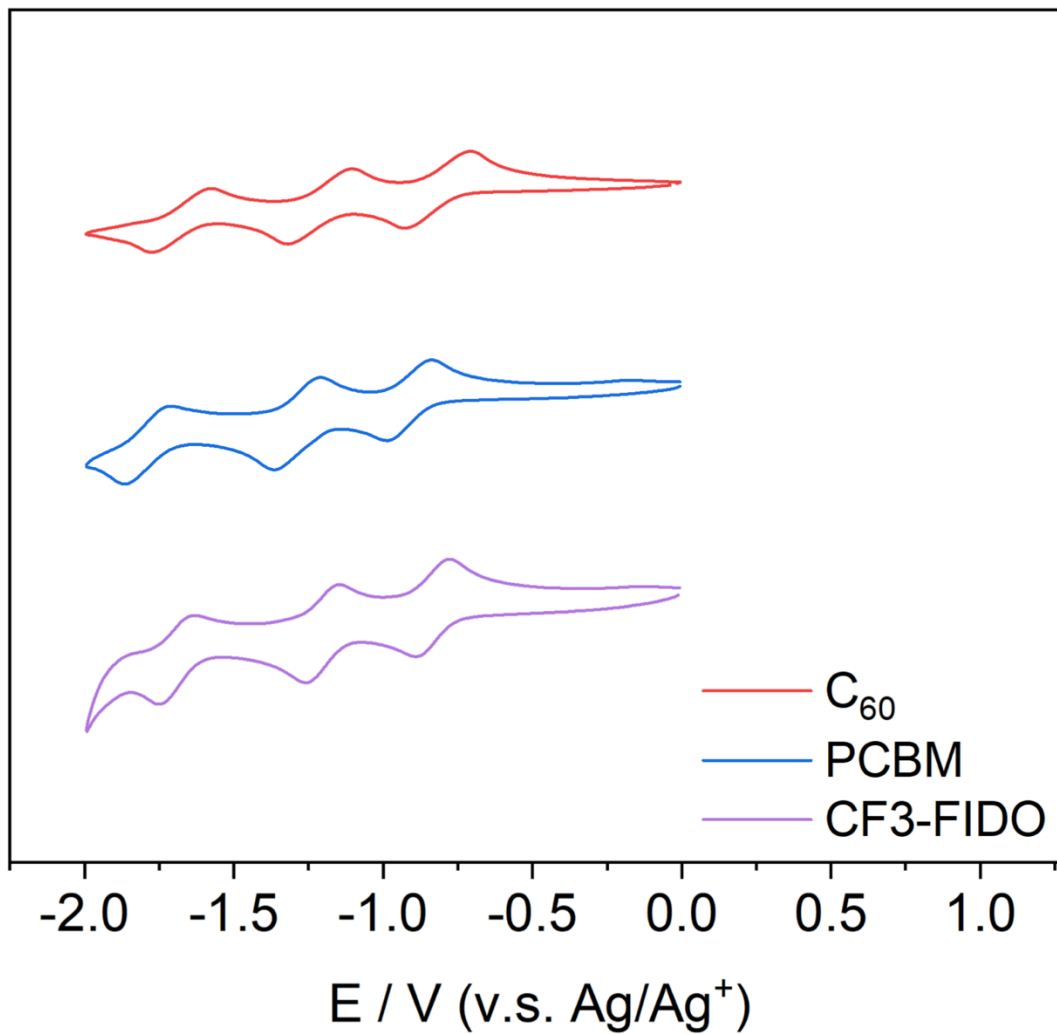

**Figure S5.** Cyclic voltammograms of fullerene derivatives in *o*-DCB solution containing  $\text{Bu}_4\text{N}^+(\text{CF}_3\text{SO}_2)_2\text{N}^-$  (0.1 M) as supporting electrolyte at 25 °C with a scan rate of 0.05 V/s. Glassy carbon, platinum wire, and  $\text{Ag}/\text{Ag}^+$  electrodes were used as the working, counter, and reference electrodes, respectively.

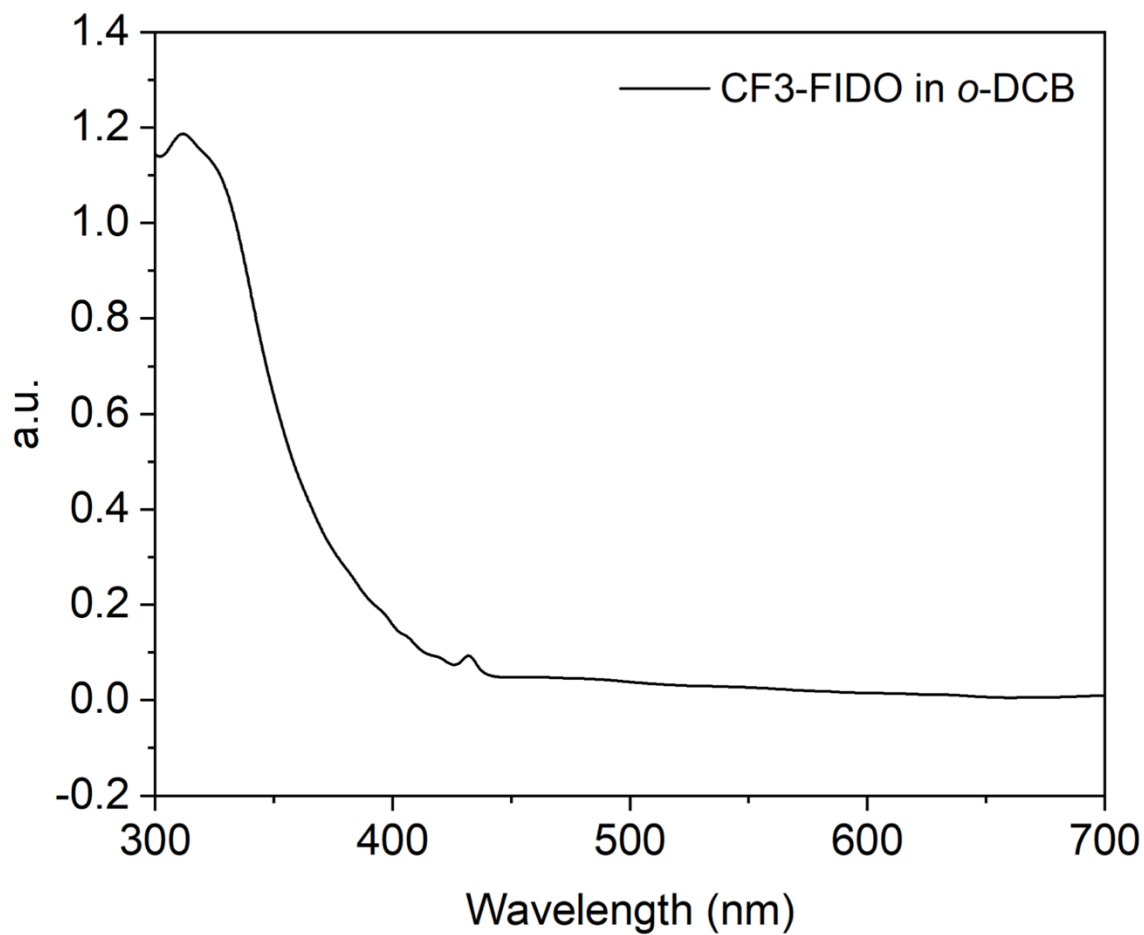

**Figure S6.** UV-visible spectroscopy of CF3-FIDO.

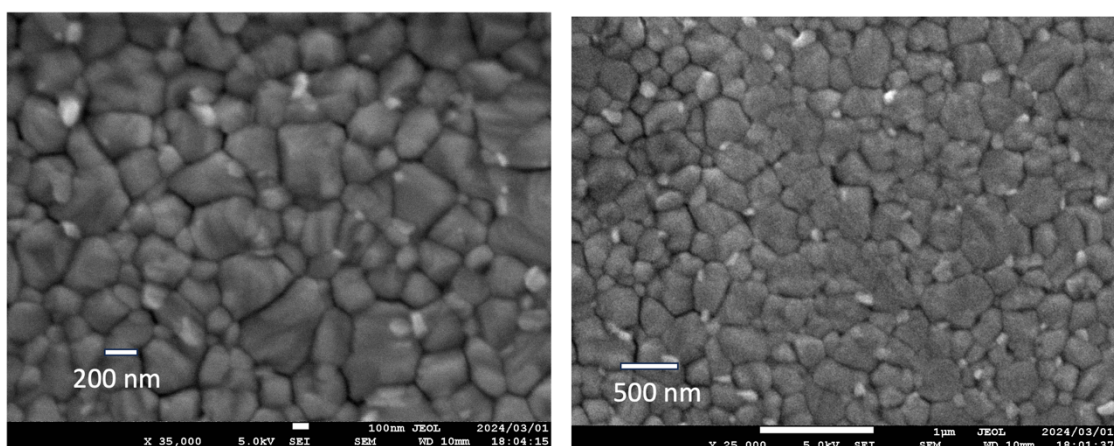

**Figure S7.** SEM picture of perovskite layer.

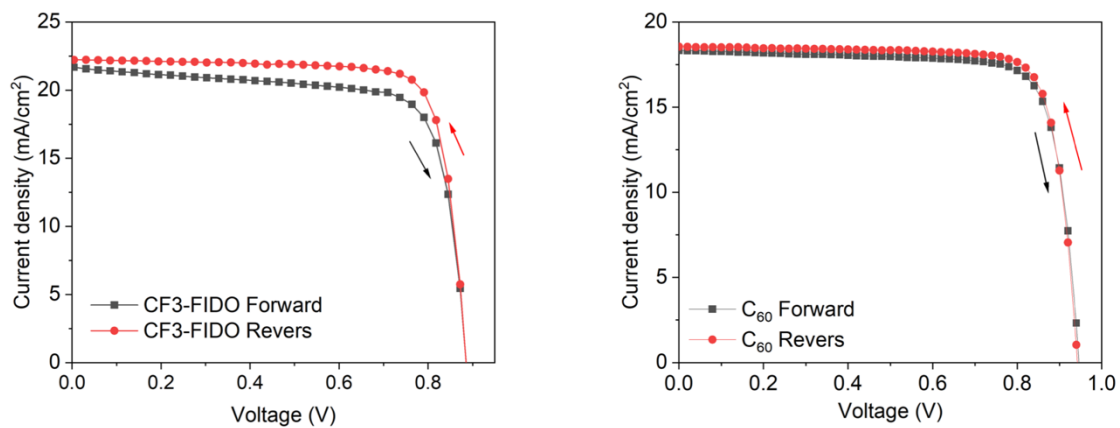

**Figure S8.** The  $J$ - $V$  curve of PSCs with forward and revers scan.

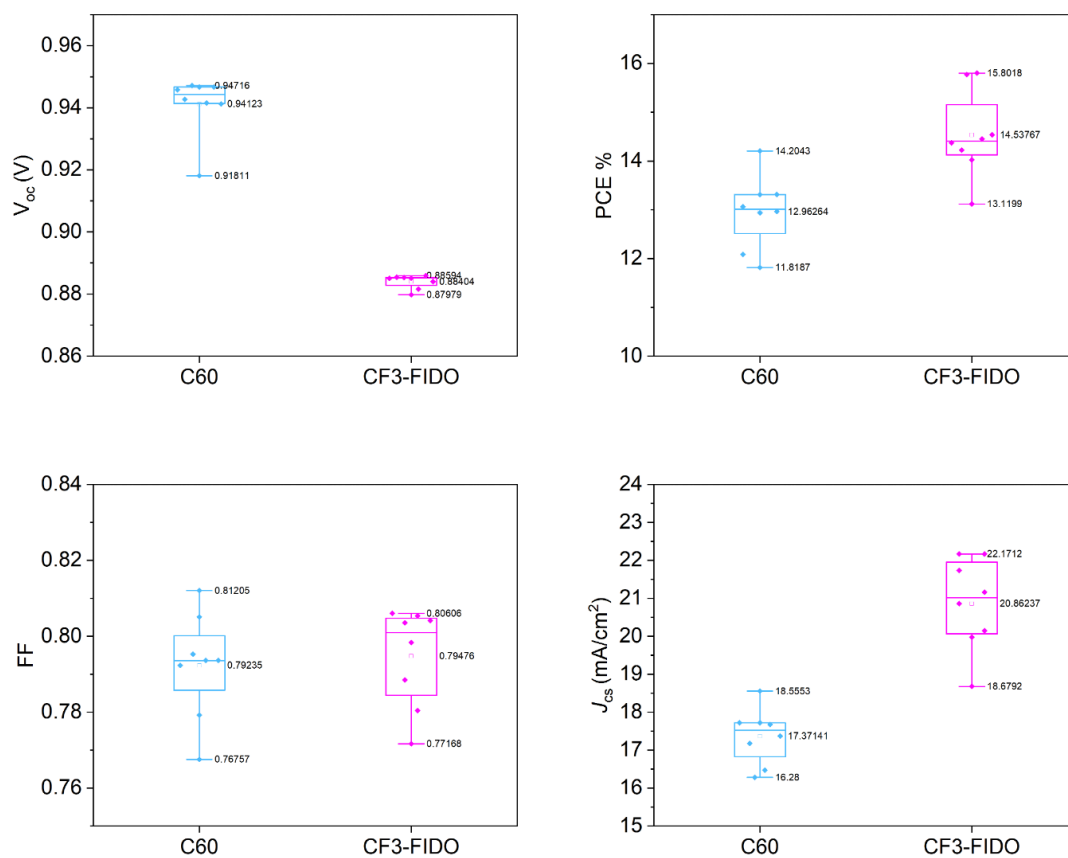

**Figure S9.** The performance distributions of PSCs.

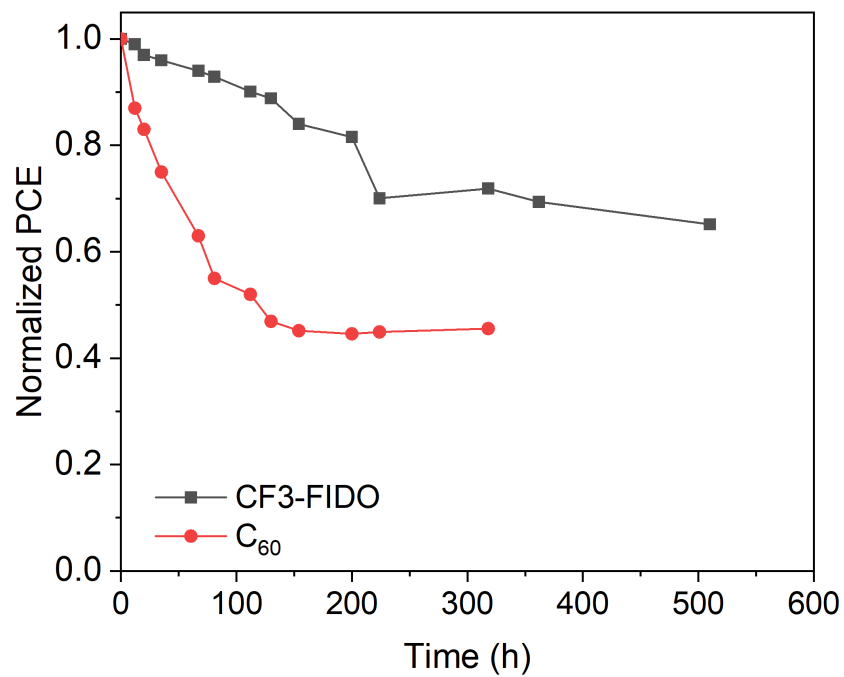

**Figure S10.** Long-term stability of perovskite solar cells. (Air, 20% humidity)

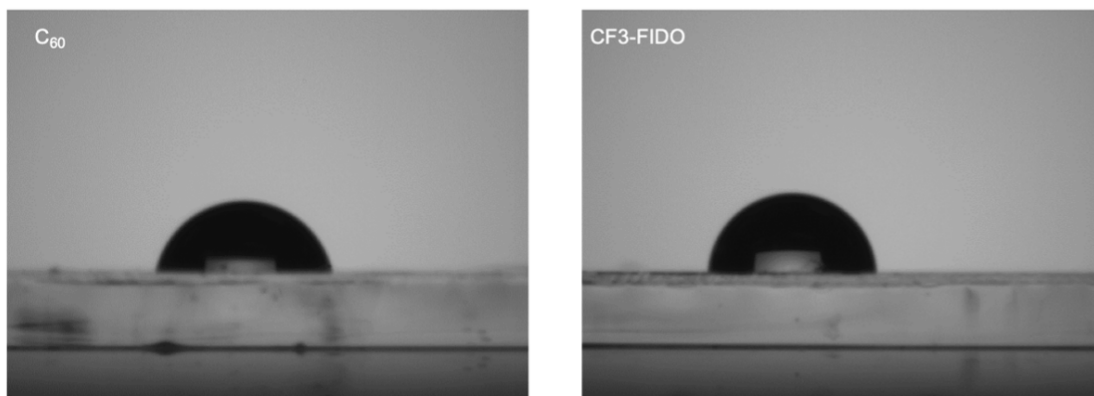

**Figure S11.** Water contact angle of fullerene derivatives. (20 nm evaporated C<sub>60</sub> or CF3-FIDO film on glass)

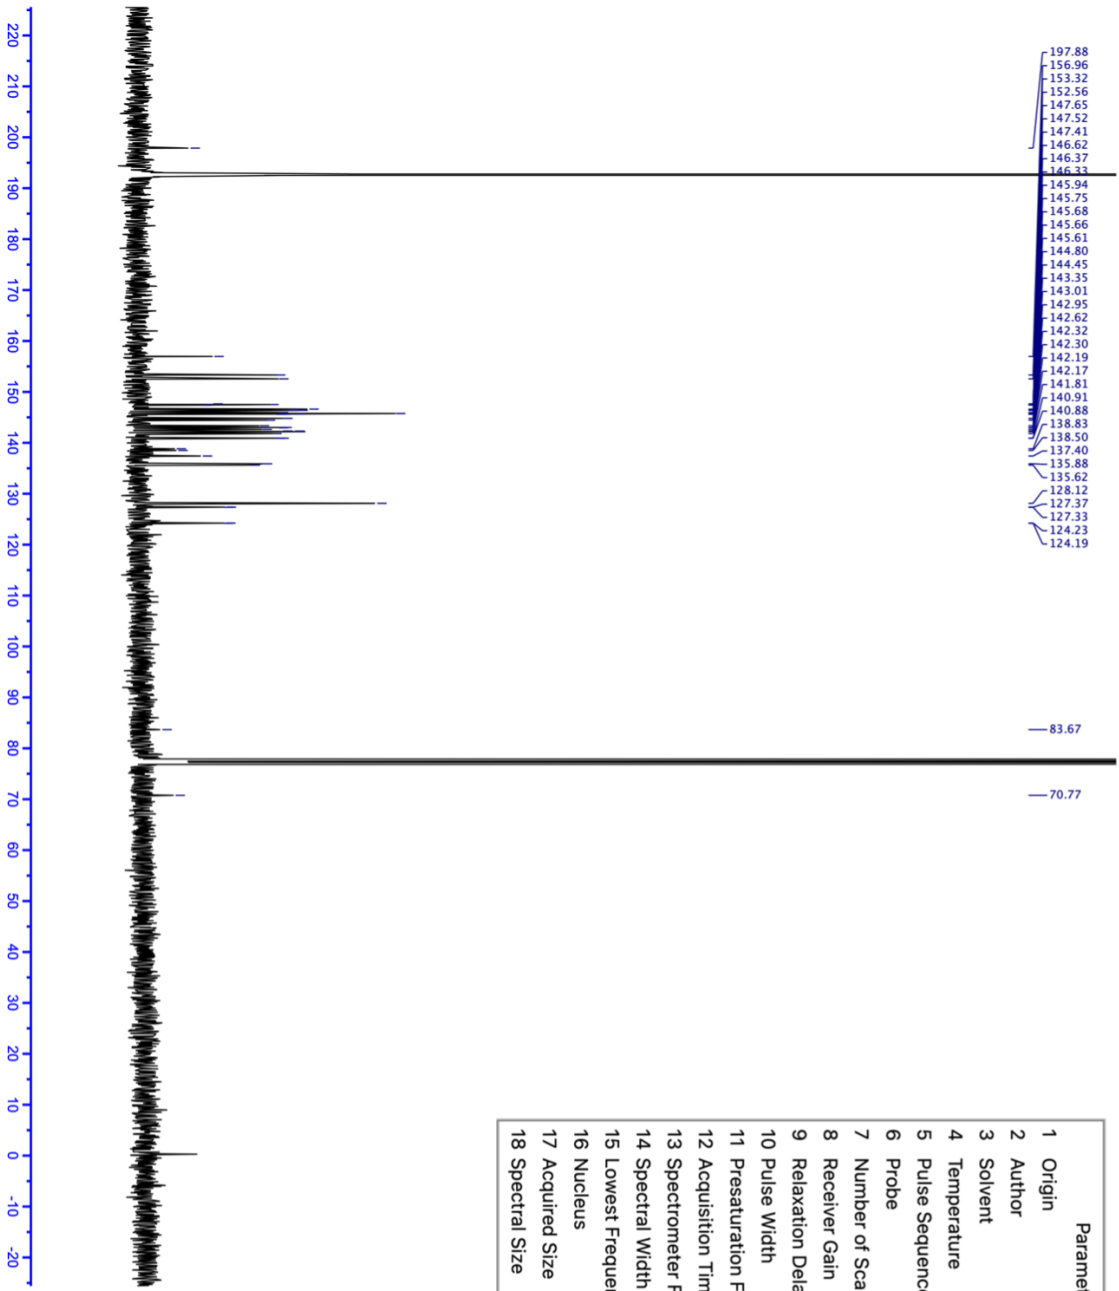

| Parameter                  | 值               |
|----------------------------|-----------------|
| 1 Origin                   | JEOL            |
| 2 Author                   | delta           |
| 3 Solvent                  | CHLOROFORM-D    |
| 4 Temperature              | 22.3            |
| 5 Pulse Sequence           | carbon_auto.jxp |
| 6 Probe                    | 2803            |
| 7 Number of Scans          | 10240           |
| 8 Receiver Gain            | 50.0            |
| 9 Relaxation Delay         | 2.2891          |
| 10 Pulse Width             | 3.3767          |
| 11 Presaturation Frequency |                 |
| 12 Acquisition Time        | 0.7109          |
| 13 Spectrometer Frequency  | 100.53          |
| 14 Spectral Width          | 25252.1         |
| 15 Lowest Frequency        | -2573.5         |
| 16 Nucleus                 | <sup>13</sup> C |
| 17 Acquired Size           | 22439           |
| 18 Spectral Size           | 52429           |

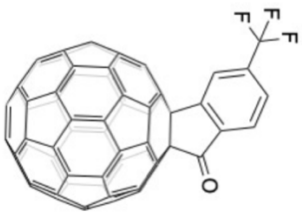

CF3-FIDO

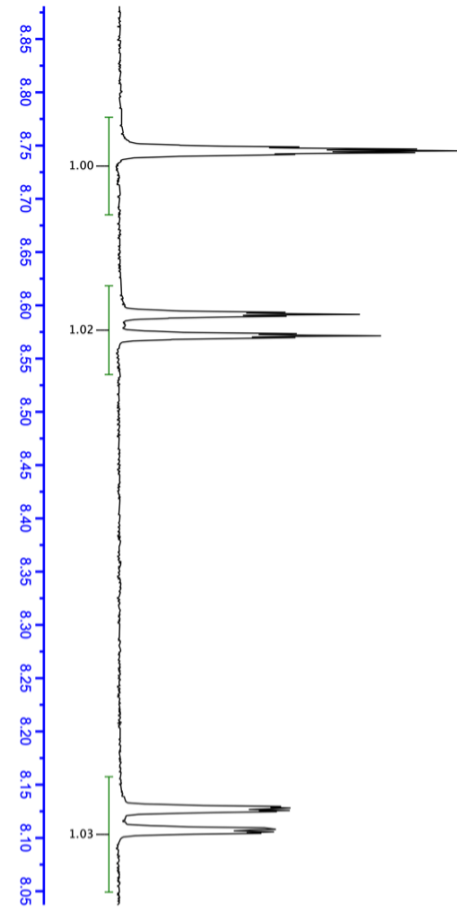

| Parameter                  | 值               |
|----------------------------|-----------------|
| 1 Origin                   | JEOL            |
| 2 Author                   | delta           |
| 3 Solvent                  | CHLOROFORM-D    |
| 4 Temperature              | 22.3            |
| 5 Pulse Sequence           | proton_auto.jxp |
| 6 Probe                    | 2803            |
| 7 Number of Scans          | 8               |
| 8 Receiver Gain            | 66.0            |
| 9 Relaxation Delay         | 5.0000          |
| 10 Pulse Width             | 3.0750          |
| 11 Presaturation Frequency |                 |
| 12 Acquisition Time        | 3.1831          |
| 13 Spectrometer Frequency  | 399.78          |
| 14 Spectral Width          | 6006.0          |
| 15 Lowest Frequency        | -1004.1         |
| 16 Nucleus                 | <sup>1</sup> H  |
| 17 Acquired Size           | 23897           |
| 18 Spectral Size           | 52430           |

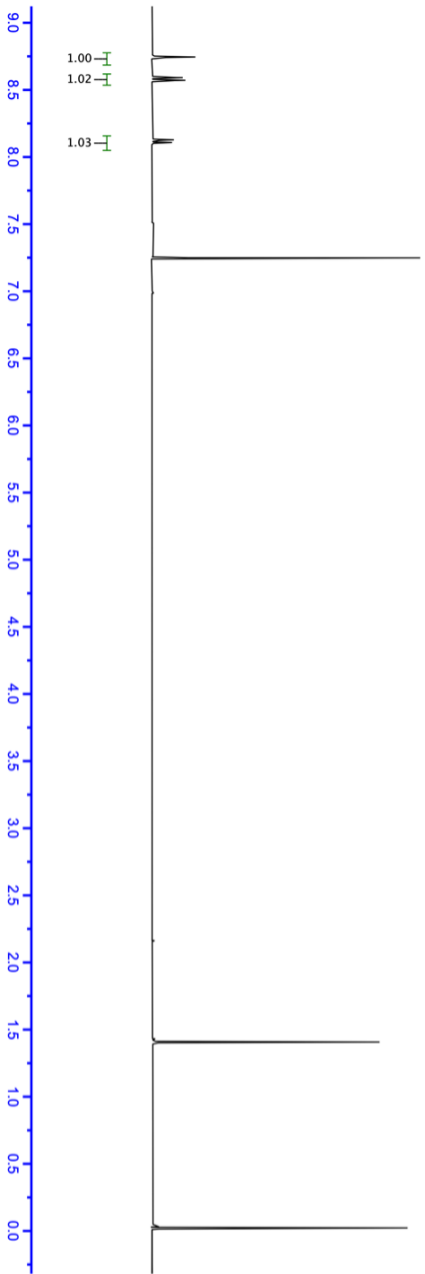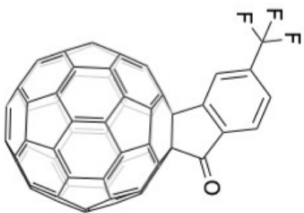

CF3-FIDO



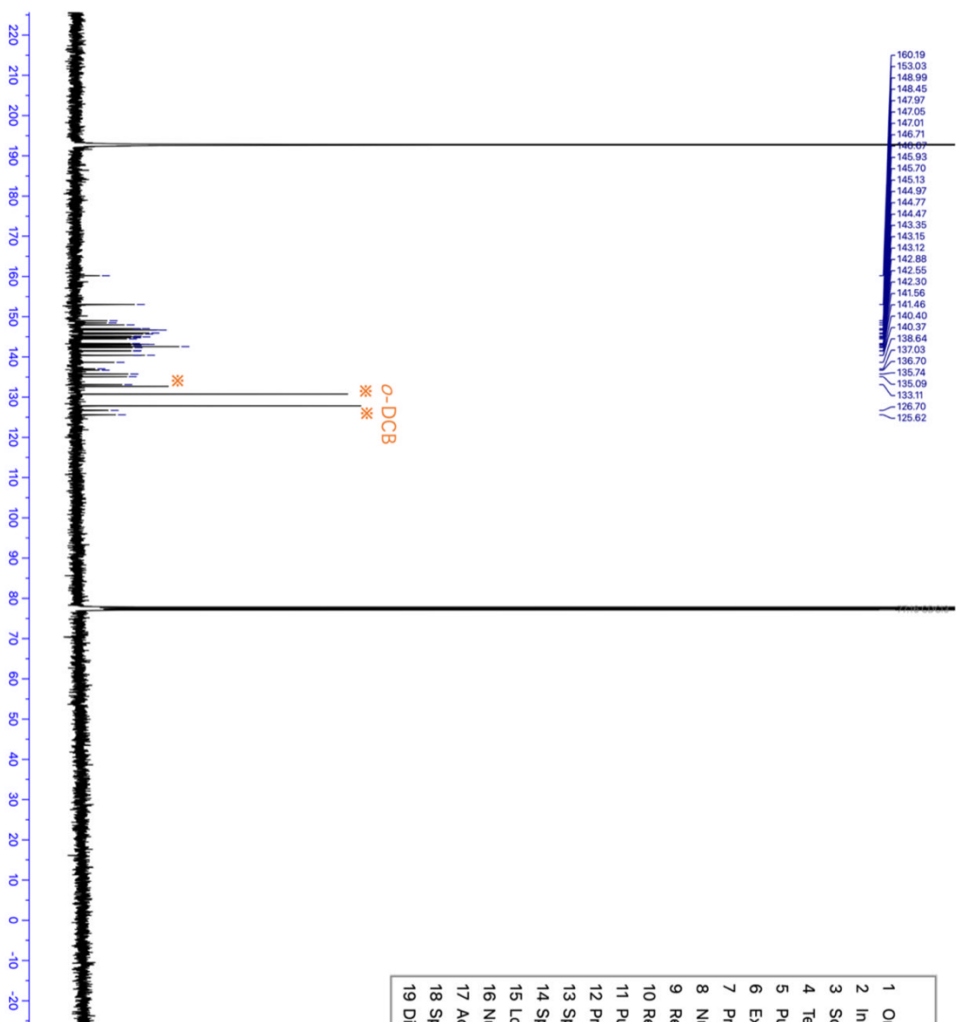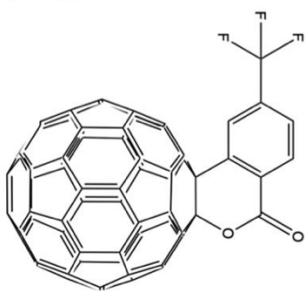

| Parameter                  | 値               |
|----------------------------|-----------------|
| 1 Origin                   | JEOL            |
| 2 Instrument               | JNM-ECZ400S/L1  |
| 3 Solvent                  | CHLOROFORM-D    |
| 4 Temperature              | 21.8            |
| 5 Pulse Sequence           | carbon_auto.jxp |
| 6 Experiment               | 1D              |
| 7 Probe                    | 2803            |
| 8 Number of Scans          | 1228            |
| 9 Receiver Gain            | 50.0            |
| 10 Relaxation Delay        | 2.2891          |
| 11 Pulse Width             | 3.3767          |
| 12 Presaturation Frequency |                 |
| 13 Spectrometer Frequency  | 100.53          |
| 14 Spectral Width          | 25252.1         |
| 15 Lowest Frequency        | -2567.2         |
| 16 Nucleus                 | <sup>13</sup> C |
| 17 Acquired Size           | 22439           |
| 18 Spectral Size           | 52429           |
| 19 Digital Resolution      | 0.48            |

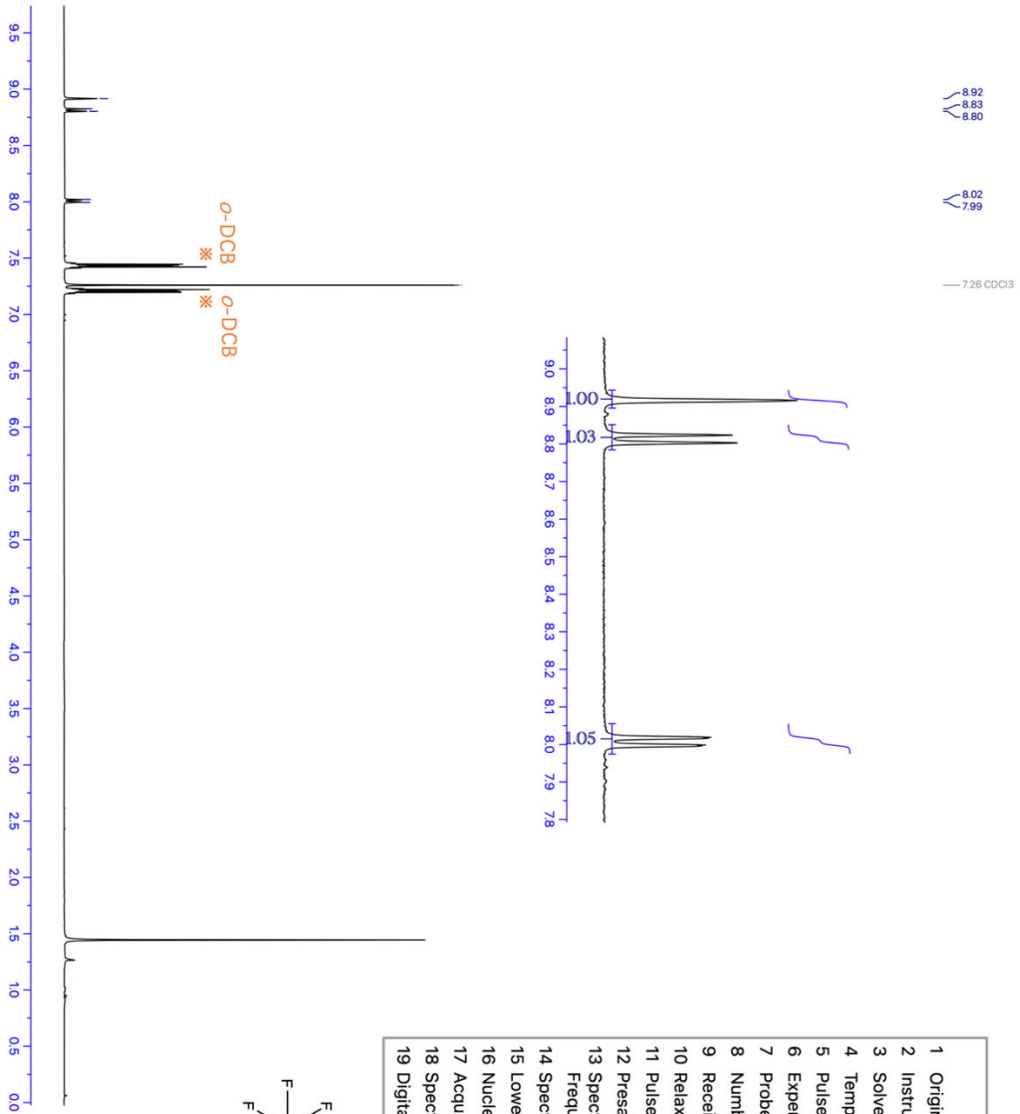

| Parameter                  | 值               |
|----------------------------|-----------------|
| 1 Origin                   | JEOL            |
| 2 Instrument               | JNM-ECZ400S/L1  |
| 3 Solvent                  | CHLOROFORM-D    |
| 4 Temperature              | 21.1            |
| 5 Pulse Sequence           | proton_auto.jxp |
| 6 Experiment               | 1D              |
| 7 Probe                    | 2803            |
| 8 Number of Scans          | 16              |
| 9 Receiver Gain            | 66.0            |
| 10 Relaxation Delay        | 5.0000          |
| 11 Pulse Width             | 3.0750          |
| 12 Presaturation Frequency |                 |
| 13 Spectrometer Frequency  | 399.78          |
| 14 Spectral Width          | 6005.9          |
| 15 Lowest Frequency        | -999.6          |
| 16 Nucleus                 | <sup>1</sup> H  |
| 17 Acquired Size           | 23897           |
| 18 Spectral Size           | 52429           |
| 19 Digital Resolution      | 0.11            |

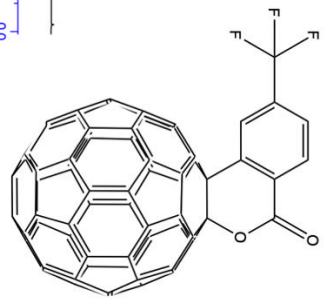

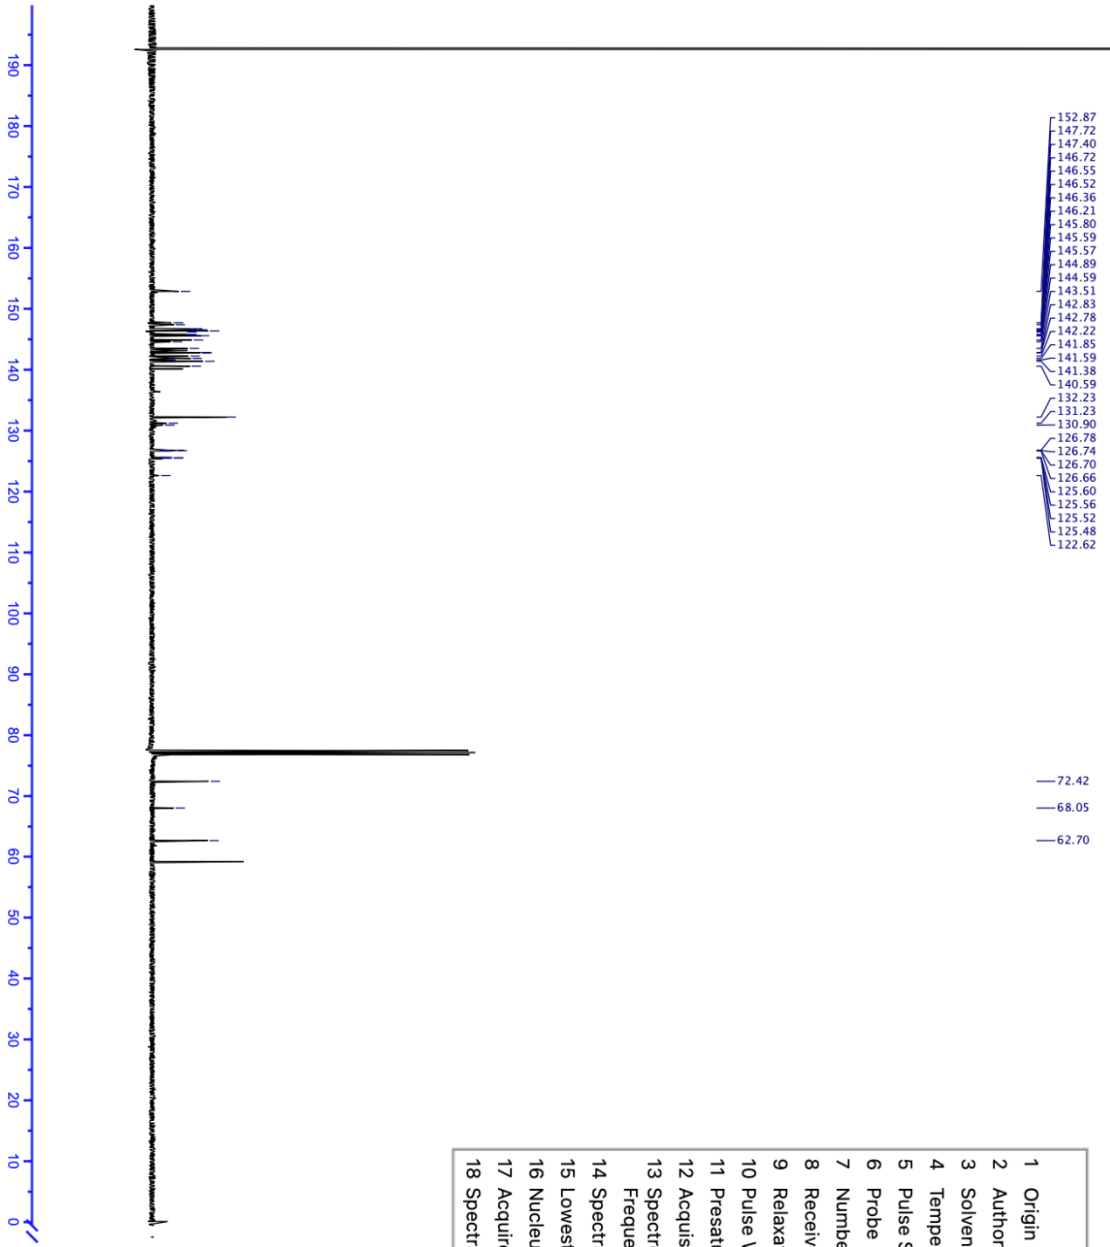

| Parameter                  | 值                |
|----------------------------|------------------|
| 1 Origin                   | JEOL             |
| 2 Author                   | delta            |
| 3 Solvent                  | CHLOROFORM-D     |
| 4 Temperature              | 21.7             |
| 5 Pulse Sequence           | single_pulse_dec |
| 6 Probe                    | 2756             |
| 7 Number of Scans          | 6144             |
| 8 Receiver Gain            | 60.0             |
| 9 Relaxation Delay         | 1.0000           |
| 10 Pulse Width             | 3.3667           |
| 11 Presaturation Frequency |                  |
| 12 Acquisition Time        | 1.0643           |
| 13 Spectrometer Frequency  | 98.51            |
| 14 Spectral Width          | 24630.5          |
| 15 Lowest Frequency        | -2470.3          |
| 16 Nucleus                 | <sup>13</sup> C  |
| 17 Acquired Size           | 32768            |
| 18 Spectral Size           | 52430            |

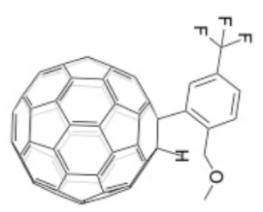

F3

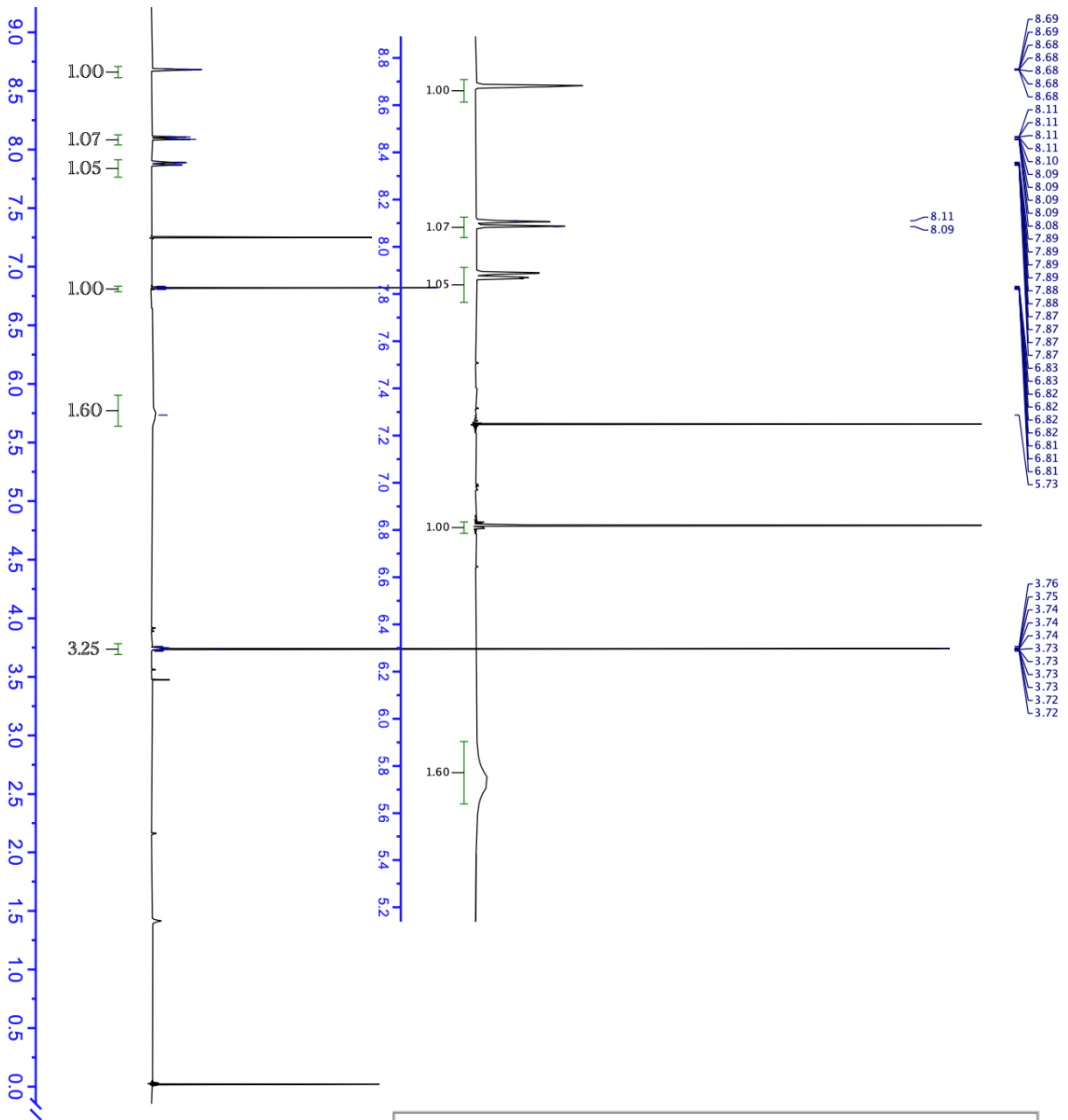

| Parameter                  | 值               |
|----------------------------|-----------------|
| 1 Origin                   | JEOL            |
| 2 Instrument               | JNM-ECZ400S/L1  |
| 3 Solvent                  | CHLOROFORM-D    |
| 4 Temperature              | 22.3            |
| 5 Pulse Sequence           | proton_auto.jxp |
| 6 Experiment               | 1D              |
| 7 Probe                    | 2803            |
| 8 Number of Scans          | 64              |
| 9 Receiver Gain            | 56.0            |
| 10 Relaxation Delay        | 5.0000          |
| 11 Pulse Width             | 3.0750          |
| 12 Presaturation Frequency |                 |
| 13 Spectrometer Frequency  | 399.78          |
| 14 Spectral Width          | 6006.0          |
| 15 Lowest Frequency        | -1004.1         |
| 16 Nucleus                 | <sup>1</sup> H  |
| 17 Acquired Size           | 23897           |
| 18 Spectral Size           | 52430           |
| 19 Digital Resolution      | 0.11            |

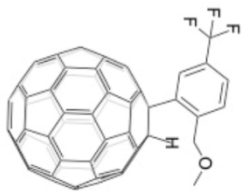

F3

Data: <Untitled>.D10[c] 30 May 2024 10:49 Cal: 13 Jul 2012 12:34  
Shimadzu Biotech Axima Performance 2.9.3.20110624: Mode Reflectron, Power: 71, P.Ext. @ 907 (bin 60)

%Int. 3.4 mV[sum= 195 mV] Profiles 1-58 Smooth Gauss 5 -Baseline 10

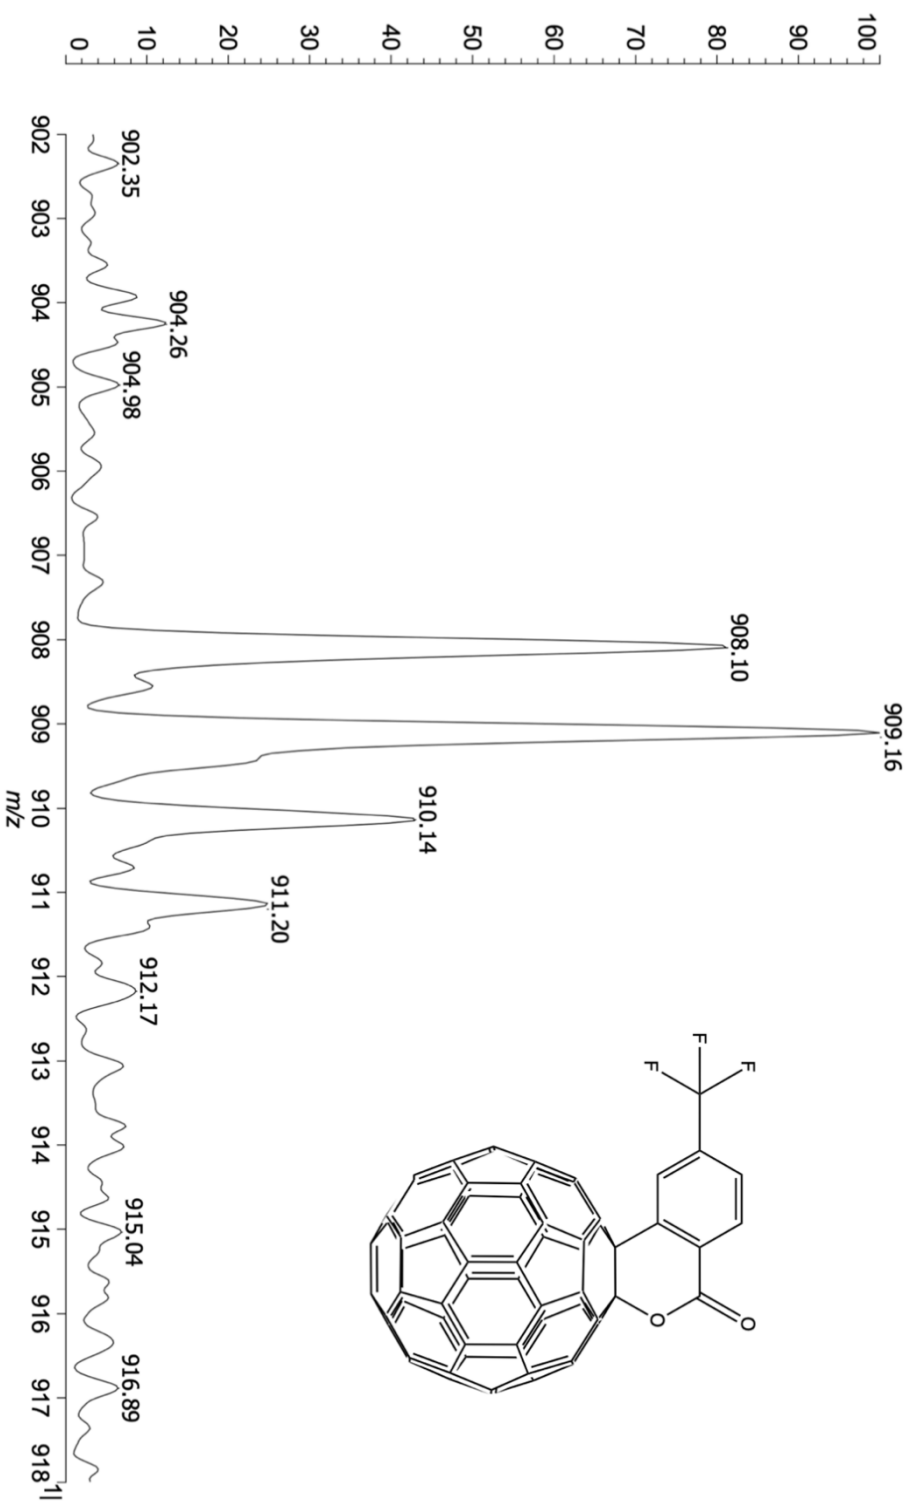

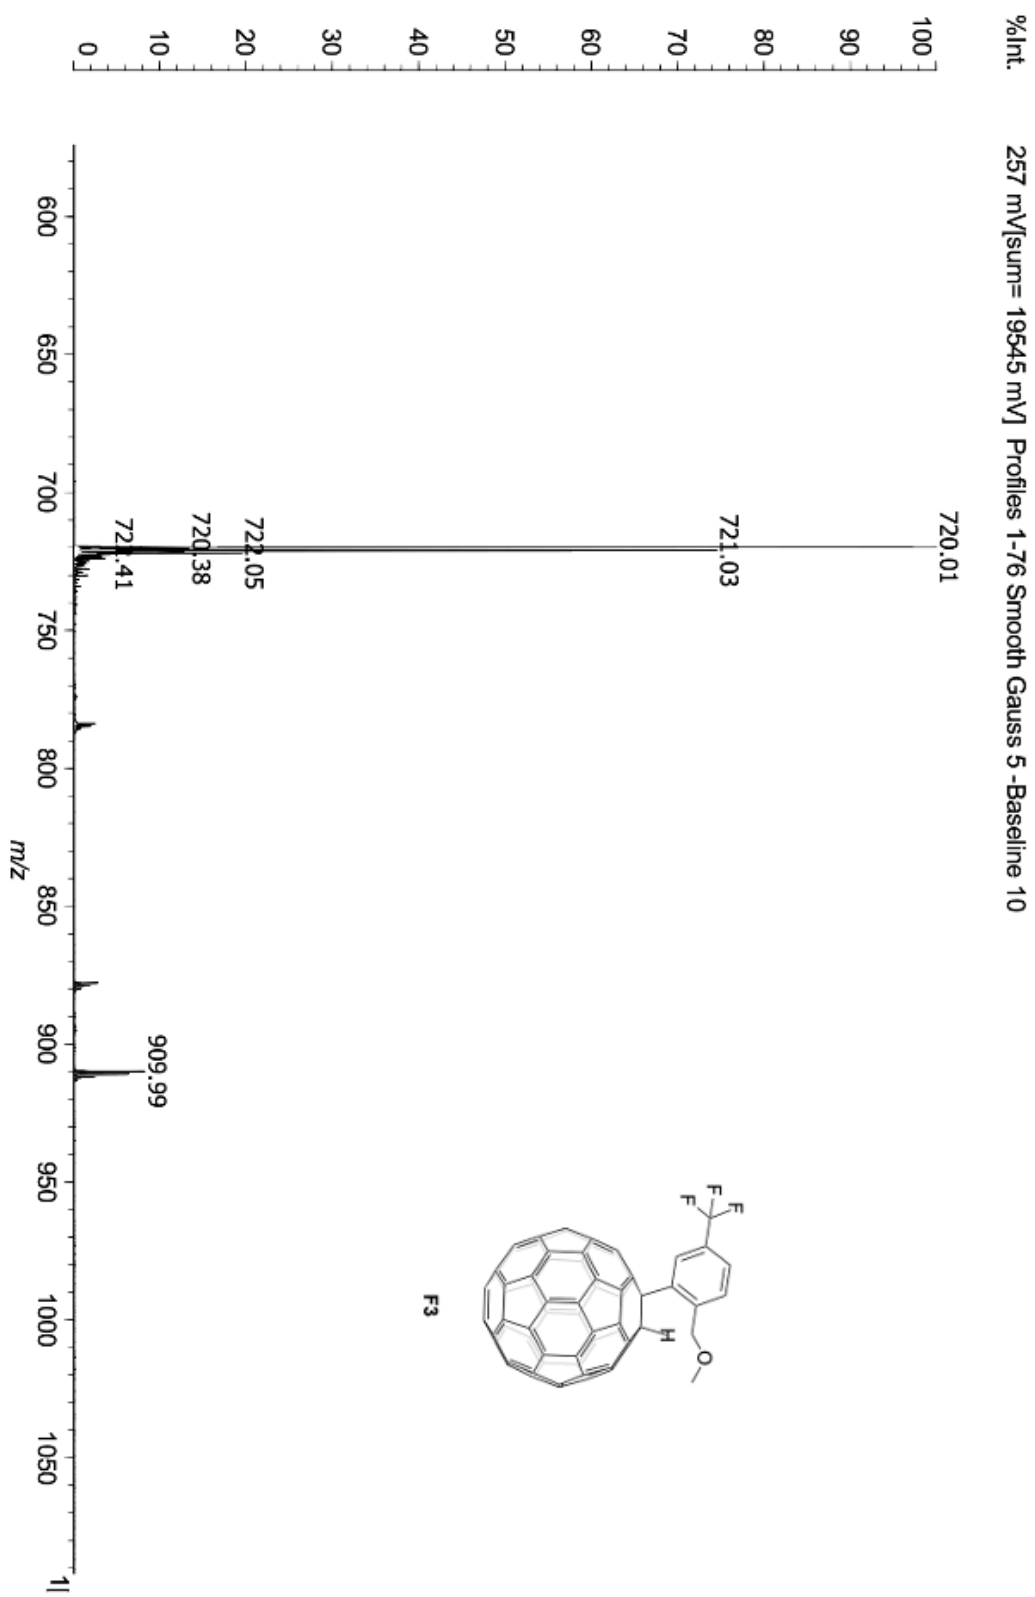

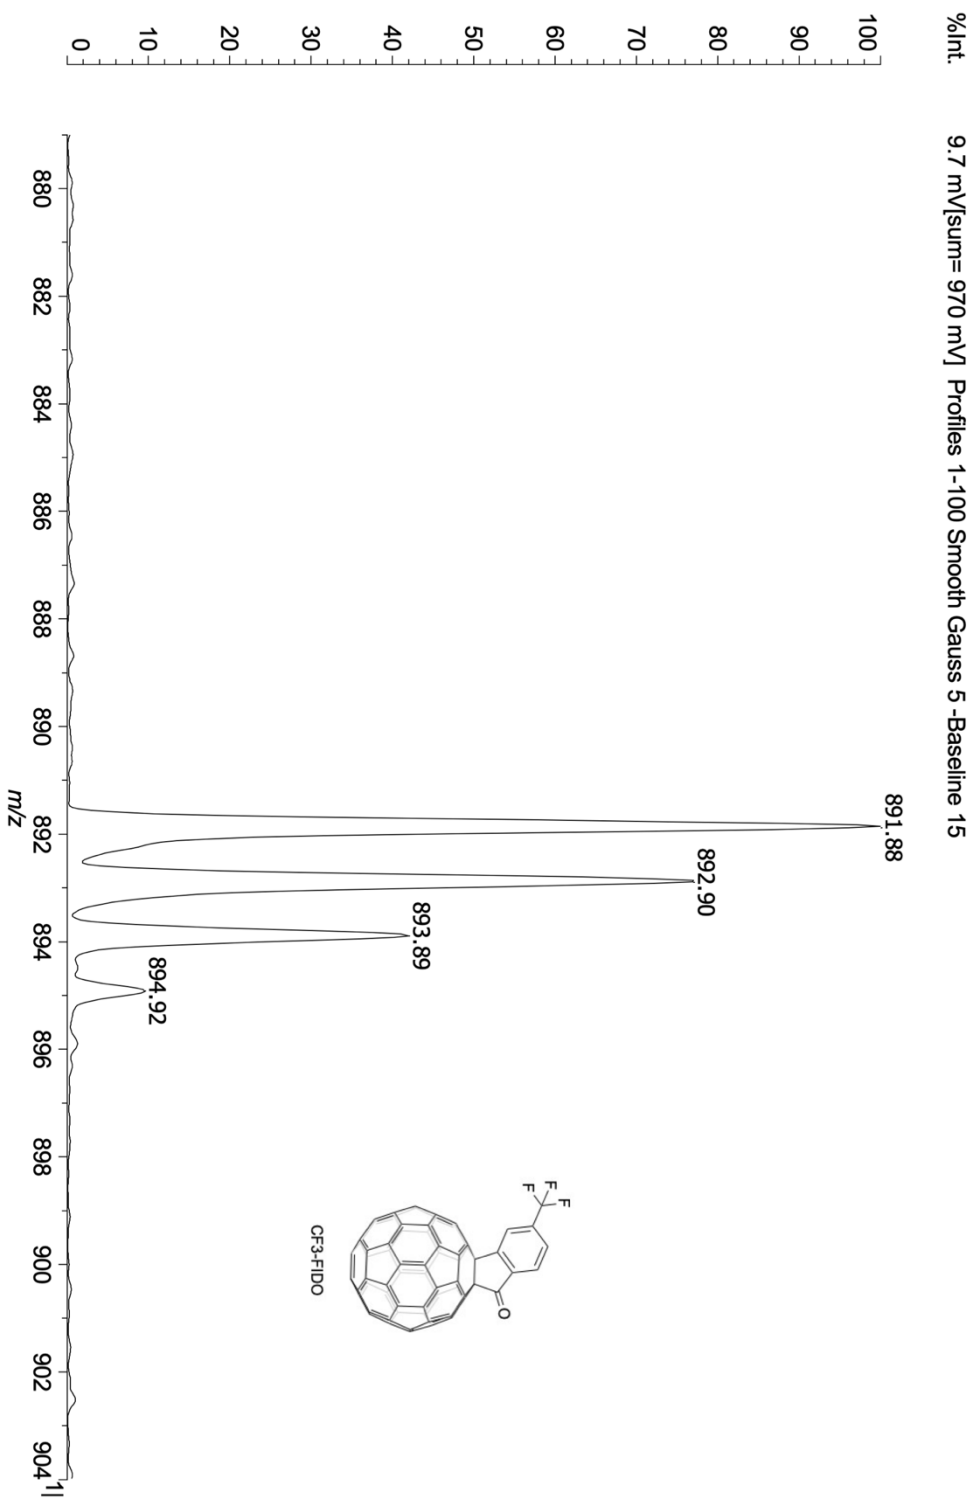

## Reference

- 1 David W I F, Ibberson R M, Matthewman J C, Prassides K, Dennis T J S, Hare J P Kroto H W, Taylor R, Walton D R M. *Nature* 1991, **353**, 147-149.
